# Supplementary material for: Depression, anxiety and insomnia among frontline healthcare workers amid the coronavirus pandemic (COVID-19) in Jordan: a cross-sectional study
Source: HighWire-hosted journal article supplement (doi:10.1136/bmjopen-2021-050078), 2022-01-01
Supplement: bmjopen-2021-050078supp001_data_supplement.pdf [file bmjopen-2021-050078supp001_data_supplement.pdf]

## Appendix A Factors associated with Anxiety, Depression and Insomnia

|      |              | Multivariate regression |         |                  |         |
|------|--------------|-------------------------|---------|------------------|---------|
|      |              | Pearson correlation     | P-value | Beta coefficient | p-value |
| GAD7 | Age          | -.137                   | .131    | --               | --      |
|      | Diploma      | .123                    | .178    | --               | --      |
|      | postgraduate | -.119                   | .191    | --               | --      |
|      | Paramedics   | .118                    | .194    | --               | --      |
|      | Nurses       | -.138                   | .130    | --               | --      |
| PHQ9 | Diploma      | 0.157                   | .085    | --               | --      |
|      | Bachelor     | -0.12                   | 0.19    | --               | --      |
|      | Paramedics   | 0.129                   | 0.158   | --               | --      |
| ISI  | Age          | -.129                   | .158    | --               | --      |
|      | Bachelor     | -.118                   | .194    | --               | --      |
|      | Paramedics   | .202*                   | .025    | 3.4              | 0.025*  |
|      | Nurses       | -.121                   | .183    | --               | --      |

ISI: Insomnia Severity Scale (7items); PHQ-9: Patient Health Questionnaire (9 items); GAD: General Anxiety Scale (7 items); \*(F=5.127, R<sup>2</sup>= 0.04)
